# Supplementary material for: Morphology-controlled synthesis of ZnO 3D hierarchical structures and their photocatalytic performance
Source: Royal Society of Chemistry journal article supplement (doi:10.1039/c2ce26157j), 2012-01-01
Supplement: c2ce26157j.pdf [file c2ce26157j.pdf]

## Supporting Information

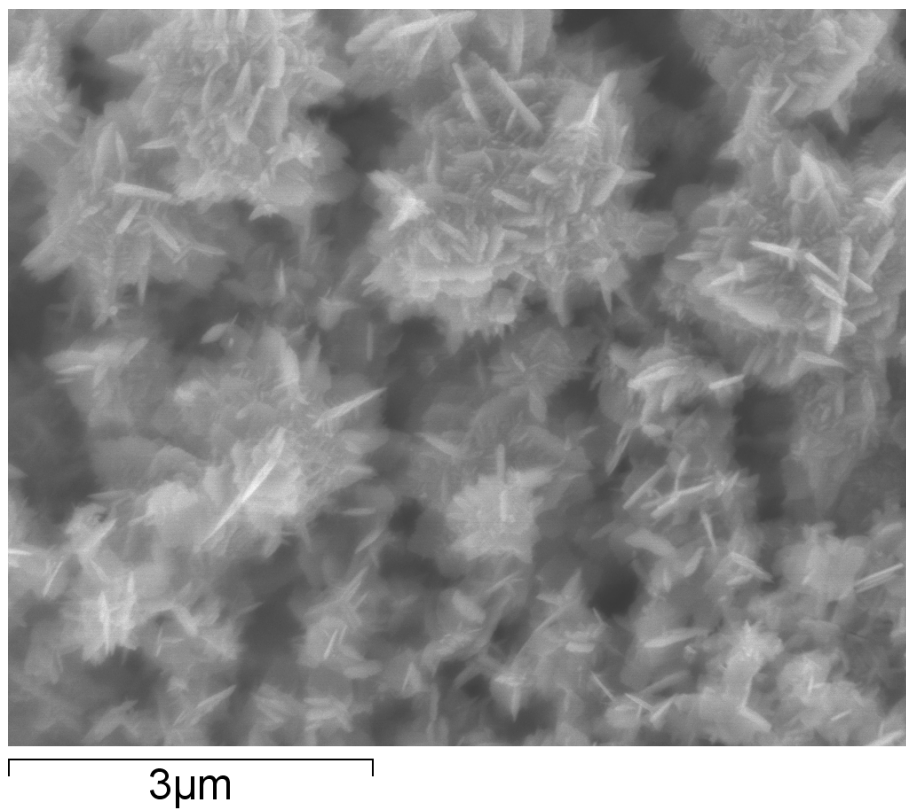

**Fig. S1.** SEM image of ZnO 3D hierarchical structure synthesized in 4.0 mol L<sup>-1</sup> KOH solution for 30 min. It shows that the coexistence of nanoneedles and nanosheets in the product.

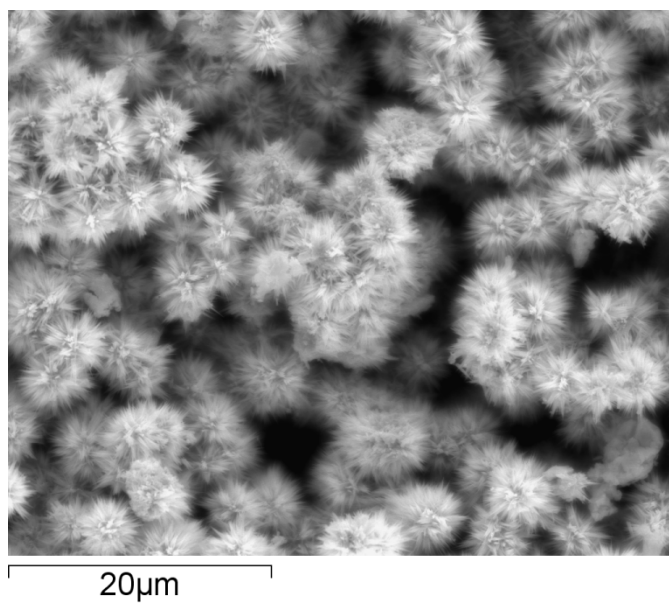

**Fig. S2.** SEM image of ZnO 3D hierarchical structure synthesized in 8.0 mol L<sup>-1</sup> KOH solution for 30 min without using zinc foil.

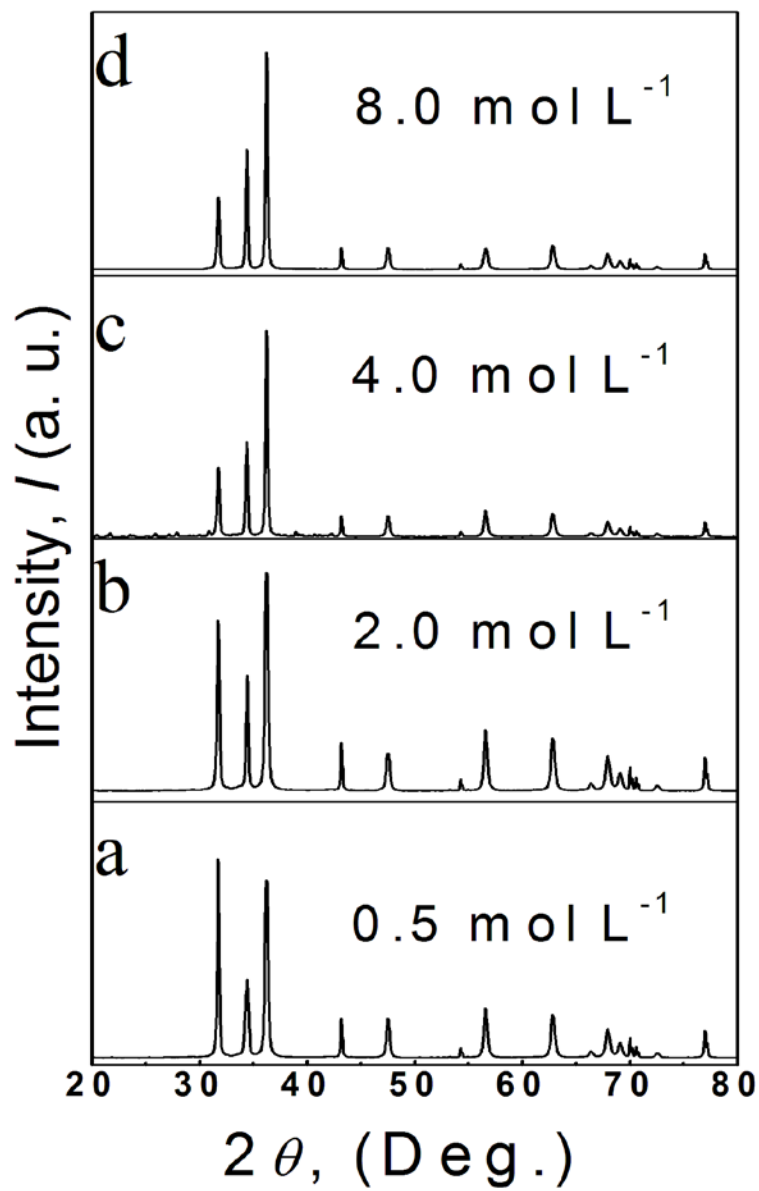

**Fig. S3** XRD pattern of the ZnO product obtained at room temperature using different KOH concentrations.

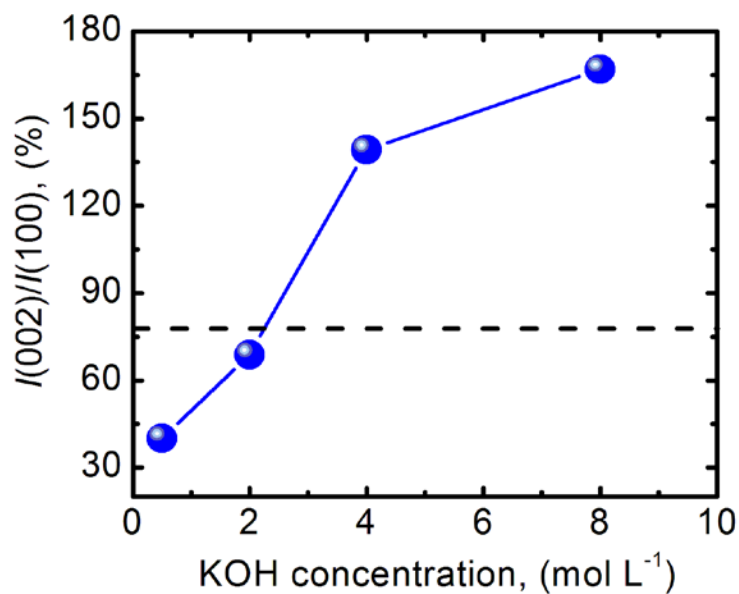

**Fig. S4.** Change in the relative ratio of the (002) peak intensity to that of the (100) peak with the KOH concentrations. The dash line in the figure is for the value from standard card.

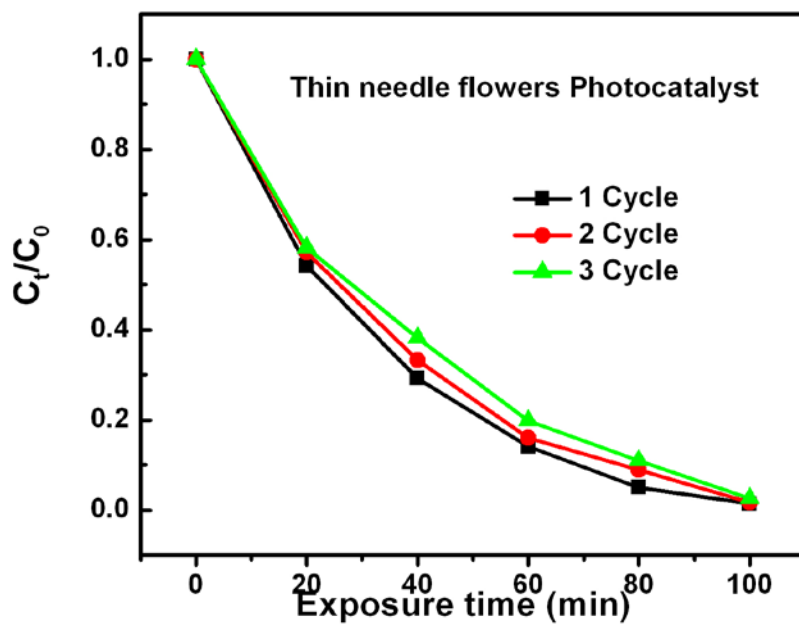

**Fig. S5.** Time profile of the change in concentration of RhB aqueous solution for the three cycles in the presence of ZnO thin needle flowers structure as photocatalyst.

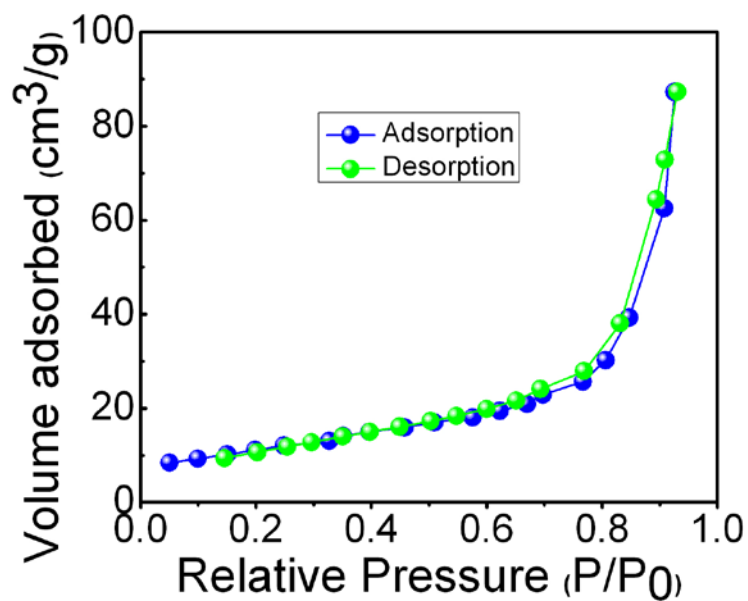

Figure S6. Adsorption-desorption isotherm of the sheet flower sample

Table 1.

| KOH concentration       | I (002) | I (100) | I (002)/ I (100) (%) |
|-------------------------|---------|---------|----------------------|
| 0.5 mol L <sup>-1</sup> | 15445   | 38679   | 39.9                 |
| 2.0 mol L <sup>-1</sup> | 18702   | 27220   | 68.7                 |
| 4.0 mol L <sup>-1</sup> | 58378   | 41904   | 139.3                |
| 8.0 mol L <sup>-1</sup> | 42296   | 25340   | 166.9                |
| Standard card           | 44      | 57      | 77.2                 |
